# Supplementary material for: Effect of Water-Induced and Physical Aging on Mechanical Properties of 3D Printed Elastomeric Polyurethane
Source: MDPI journal article supplement (doi:10.3390/polym14245496), 2022-12-15
Supplement: s1 [file s1]

## Supplementary data

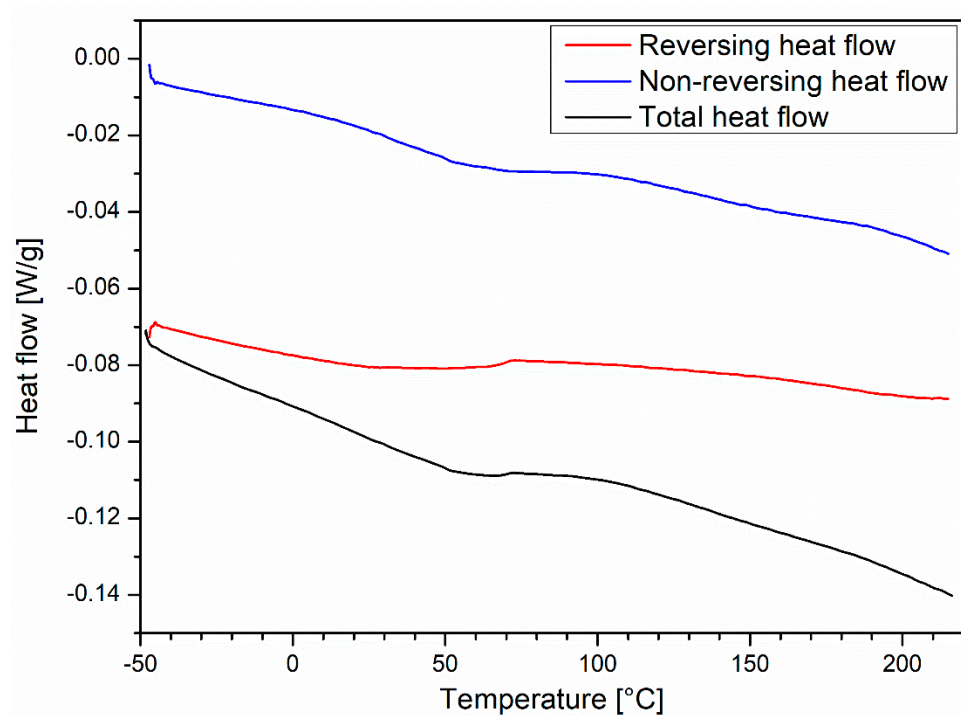

**Figure S1.** Modulated DSC thermogram of EPU40 after the dual-curing; temperature range from -50 to 220 °C, heating rate 2.5 °C/min., amplitude 0.3 °C, period 60 s, N<sub>2</sub> atmosphere, 10–15 mg of sample was loaded in hermetically sealed aluminum pan.

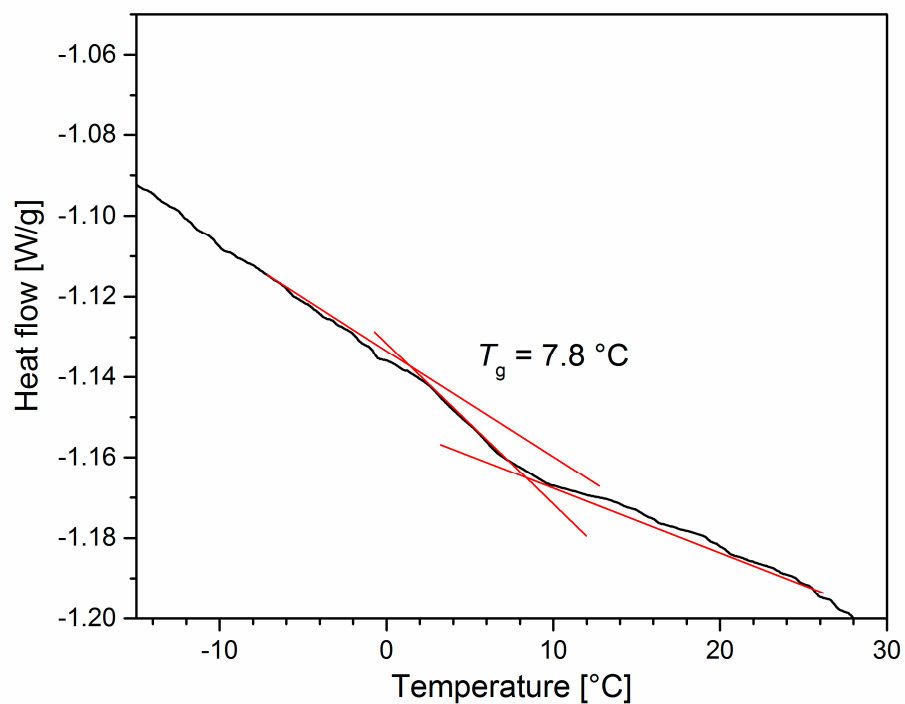

**Figure S2.** DSC thermogram of EPU40 after dual-curing; temperature range from -50 to 100 °C, heating rate 10 °C/min, N<sub>2</sub> atmosphere, approx. 5 mg of sample loaded in the aluminum pan.
